# Supplementary material for: Circadian Regulation of Glutathione Levels and Biosynthesis in Drosophila melanogaster
Source: PubMed Central journal article supplement (PMC3511579; doi:10.1371/journal.pone.0050454), 2012-11-30

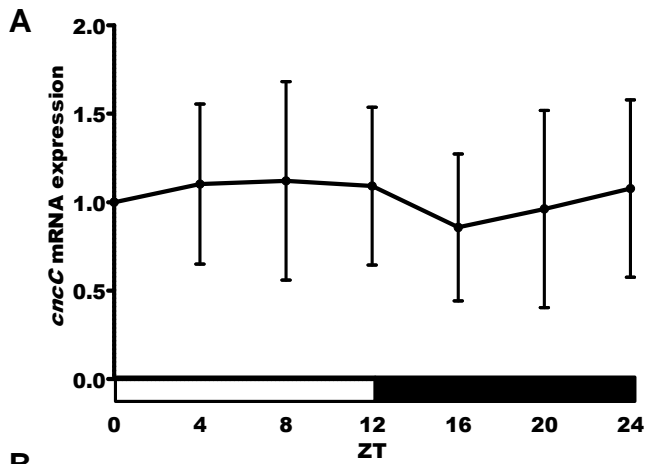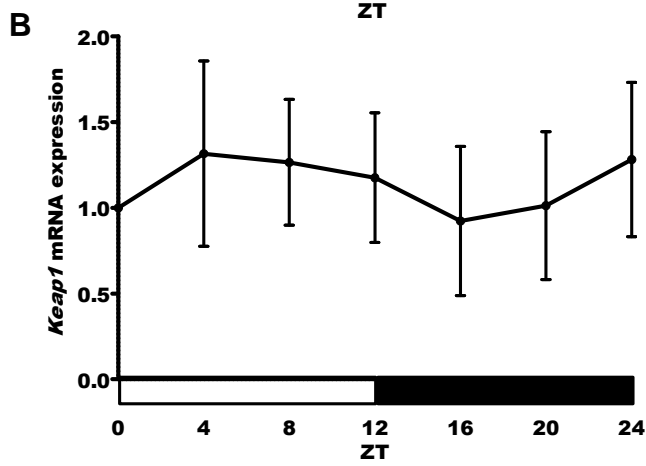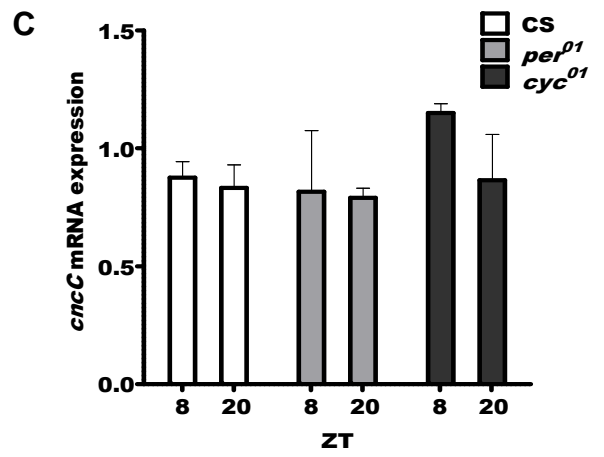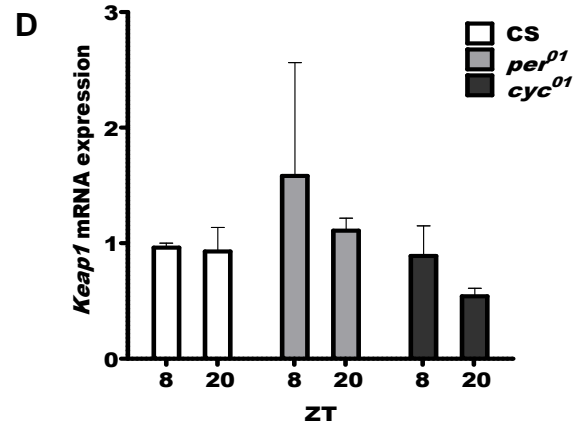

Supplement: pone.0050454.s001.pdf [file pone.0050454.s001.pdf]
